# Supplementary material
Source: PubMed Central journal article supplement (PMC4753595)

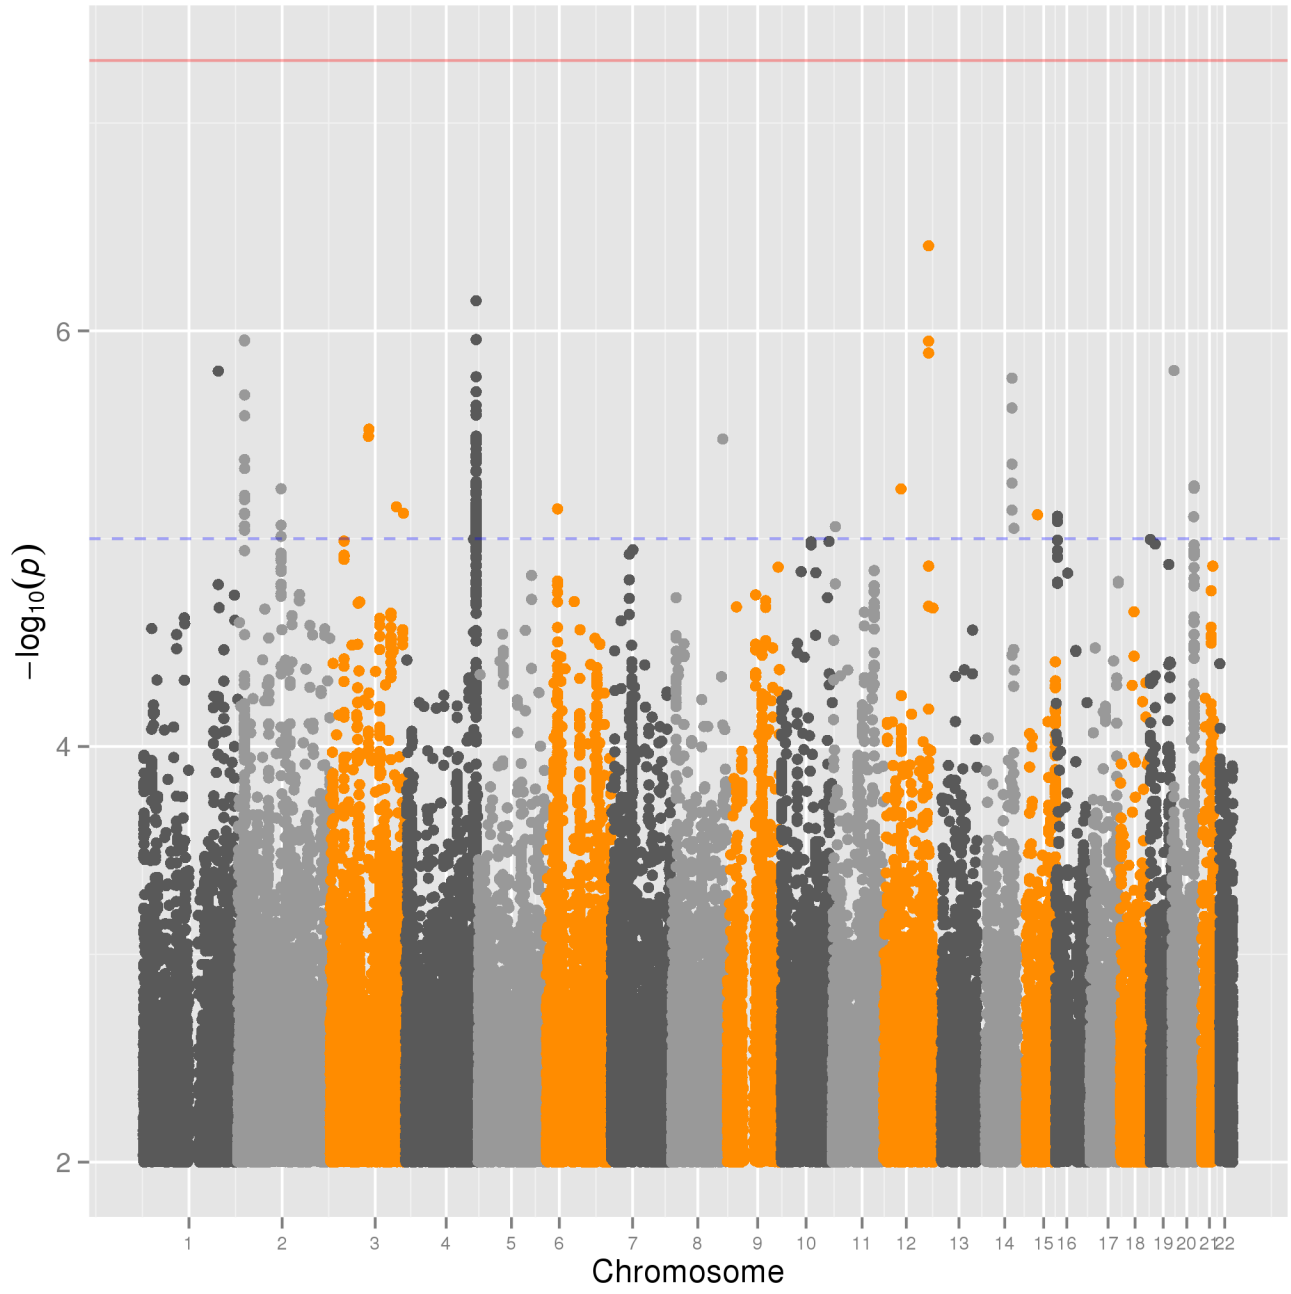

Supplement: supp_sbv119_Supplementary_Figure_2_pos_manhat.pdf [file supp_sbv119_Supplementary_Figure_2_pos_manhat.pdf]
